# **Title: What keeps male amateur rugby union players committed to the game despite high risk of injury? A qualitative study.**

## **Author Names and Affiliations:**

Samuel Jake Lane<sup>a</sup>, Dr Colin Ayre<sup>ab</sup>

<sup>a</sup>University of Bradford, Richmond Rd, Bradford, West Yorkshire, England, BD7 1DP

<sup>b</sup>Bradford Teaching Hospitals NHS Foundation Trust, Duckworth Lane, Bradford, England BD9 6RJ

## **Corresponding Author:**

Samuel Jake Lane [samlane660@gmail.com](mailto:samlane660@gmail.com)

Present Address: 115 Maidenhall, Highnam, Gloucester, GL2 8DJ, +44 07307791544

## **Abstract**

*Objectives:* Rugby Union is a popular sport worldwide characterised by high intensity full contact match play. Injuries are common during matches and training. While musculoskeletal injury is expected in such a sport, there is emerging research evidence and increased public awareness of neurodegenerative disease risks. The objectives of the present study are to explore reasons for continued participation despite high risk of injury, gain understanding of perceived importance of participation and insight into why players may play with chronic injury.

*Design:* 10 male amateur rugby union players in Gloucestershire and Yorkshire aged 30±5.75 with 20±6.93 years of playing experience participated in semi-structured interviews with subsequent thematic analysis of transcripts.

*Results:* 4 major themes of identity, community, risk acceptance, and uniqueness of rugby were identified. None of the players reported plans to reduce participation in rugby.

## *Conclusions:*

Despite risks of injury there were no plans to reduce participation amongst players interviewed. Benefits gained from rugby are abundant and meaningful to players. Understanding these beliefs is helpful for medical staff supporting players, especially through injury. Overall, commitment to amateur rugby union remains strong despite

new knowledge of the long-term risks involved. The findings show that amateur rugby union remains a popular sport with benefits extending beyond physical activity.

### Highlights

- There are 4 key themes regarding commitment to participation in male amateur rugby union despite risk of injury, regardless of new insights of potential long term injury risk and available injury epidemiology data
- Current players remain firmly committed to playing citing more benefits than negatives.
- Knowledge of risks is limited in the playing population recruited. This is significant as it highlights an issue that needs to be addressed regarding players ability to make an informed choice about their involvement in the game.

### Key words:

Motivation, Participation, Sport, Rugby Union

47

## **Introduction**

48 Rugby union is a contact sport with a high risk of injury during training and matches  
49 [1]. Due to the aggressive nature of the sport, musculoskeletal injuries are  
50 commonplace. Research into the epidemiology of rugby injuries has highlighted the  
51 high severity (days lost or matches missed) and incidence of injuries across amateur  
52 and professional populations, reporting the most common injury as concussion, with  
53 tackling being the most injurious action [2-6].

54 Former players are more likely to report suffering post-retirement effects of injury  
55 than former non-contact athletes [7] and increased difficulty with pain, mobility, and  
56 self-care compared to general population [8]. At the extreme, life changing  
57 permanent disability and even deaths have resulted from injuries sustained playing  
58 rugby union [9-11]

59 There is emergent evidence of increased risk of neurodegenerative disease  
60 associated with head contact from rugby collisions [12]. While this research was  
61 conducted on former professionals, the commonality of concussion across playing  
62 populations suggests this risk is apparent for amateurs.

63 Most existing literature examining motivation for participation has been conducted on  
64 female athletes and concerned factors for playing in the first instance, with an  
65 interest in gender roles and inclusivity [13-15]. However, key themes from those  
66 studies on female athletes including culture, sense of challenge, 'love of the game',  
67 and achievement were echoed in Dong et al's [16] research on middle-aged male  
68 players including: making friends, the love of rugby (despite the risk and injuries),  
69 and self-actualisation. Aggression and physicality appear to be fundamental  
70 motivators with many interviewees highlighting these elements as the reason they  
71 were first attracted to or continue to play [13, 14, 16,17]. Madrigal et al [18] found  
72 passion for the sport and sport ethic to be major themes for playing through pain and  
73 injury in collegiate rugby, concluding that many will only stop with an external  
74 mandate (coach, parent, medical staff), or if impacting their activities of daily living.  
75 To the authors knowledge this is the first study investigating the reasons for  
76 participation in the amateur male playing population.

77 **Aims and objectives**

78 There is a gap in the literature regarding the current male amateur rugby union  
 79 playing population, specifically post emergent evidence of concussion risk and future  
 80 health implications. It is hoped that an understanding of player beliefs and values  
 81 may help develop empathy and improve patient centred care in rehabilitation. This  
 82 may also shape discussions around medical retirement and how this can be done in  
 83 a meaningful and supportive way, considering the players' perceived importance of  
 84 continued participation. There is also potential to provide context to why players are  
 85 willing to play through injury or return to sport prematurely.

86 This study also aimed to determine if current players' attitudes to injury risk and  
 87 potential for long term health issues have been impacted by recent media coverage.

88 Objectives:

- 89 • To explore reasons for continued participation despite high risk of injury
- 90 • To understand the perceived importance of continued participation in rugby  
91 union
- 92 • To provide insight into reasons why players may continue to play with chronic  
93 injury.

94

## **Methods**

95 Ethical approval was granted by the Chair of the Biomedical, Natural, Physical and  
 96 Health Sciences Research Ethics Panel at the University of Bradford on 12th  
 97 October 2023 with amendments approved 13th November 2023. Convenience and  
 98 snowball sampling techniques were utilised to recruit 10 current male amateur rugby  
 99 union players over 18 years old in Gloucestershire and Yorkshire. All players  
 100 involved were currently registered with amateur clubs at or below level 6 of the RFU  
 101 pyramid. Participant information sheets were provided with written informed consent  
 102 of participants obtained prior to involvement in the study. Audio recording and  
 103 automated transcription of the interviews was done using Otter.ai. Transcriptions  
 104 were corrected using original audio files, anonymised, and member checked by  
 105 participants. Once final transcripts were confirmed audio recordings were destroyed.  
 106 Interview transcripts were analysed using Braun and Clarke's [19] reflexive thematic  
 107 analysis method to deduce common themes to answer the research question.

## Results

Results of the main study produced major themes of *community*, *identity*, *uniqueness of rugby*, and *risk acceptance*. These were derived from the codes and initial themes seen in table 3. Of the 10 players interviewed 9/10 had suffered injuries as a direct result of playing rugby. Tables 1 and 2 highlight the nature and incidence of injuries sustained by the sample.

### Community

All participants reported the community and social aspects of rugby as key reasons for remaining committed to the game, with 6/10 mentioning the contribution towards a collective goal or something bigger than themselves. There were numerous mentions of the club as a social hub on game days beyond. Friendships that were formed playing rugby also appeared to go much further than the 80 minutes of gameplay.

**P3** *“So the biggest one is obviously the friendships. Many... well, all of my close friends play rugby with me... not only are we friends off the pitch socially, but it is a way of bonding together in a collective cause...”*

**P6** *“I think there's great joy to be found when you're playing, you're buying into a common goal... And then you come through it all together, win or lose and you've done it in a way that was difficult, tiring, painful...”*

### Identity

Winning and the feeling of elation having worked hard with others was a key element of continued participation. 6/10 players discussed rugby as being part of their weekly routine and would suffer without this.

Participants had played an average of 20±6.93 years and 4/10 went as far as saying they “had always done it”. The sense of identity as a rugby player was most evident when participants discussed negative experiences of being sidelined with injury and how they would struggle if they could no longer play.

**P3** *“you feel like you're not part of the team, you're not part of squad and... I found that quite stressful and quite difficult.”*

137           **P4**     *“...you’re not really having an input apart from cheering them*  
138                     *on...you’re still their mate...but you’re essentially just a fan.”*

139           **P5**     *“... I'd say it's almost a bit like a badge of honour ... and if I were to*  
140                     *stop playing, would it feel like a bit of a fraud thing? A has-been sort of*  
141                     *thing? I think that's an important part of it psychologically... that*  
142                     *probably is what keeps me still going secretly.”*

143           **P10**    *“I remember feeling... almost outcast... like I wasn’t kind of needed or*  
144                     *it didn’t matter to anyone that I wasn’t playing or wasn’t there”*

# 145    Uniqueness of Rugby

146    The uniqueness of rugby could be categorised as physical, mental, and other  
147    aspects. Players highlighted the physicality of contact sport and a fun way to  
148    maintain fitness as being a strong motivating factors for playing the game. Mental  
149    health and escapism from daily worries were discussed by 7/10 and 5/10 players  
150    respectively. Players struggled to define exactly what differentiates rugby from other  
151    sports. Common remarks were the excitement of the changing room, the feeling of  
152    winning, and the physical demands required for success.

153           **P1**     *“When you play the game you forget about everything else... you're in*  
154                     *that moment, and you're focused on the task at hand and nothing else,*  
155                     *you don't think about anything else, I don't find that I think about how*  
156                     *stressful my week is. It actually all goes away”*

157           **P3**     *“...the certain type of person that wants to play rugby and enjoys that*  
158                     *competitive aspect is... a physical person who enjoys contact and*  
159                     *enjoys that confrontational element. So if you were to water down the*  
160                     *game too much, I don't think it would be rugby.”*

161           **P10**    *“ I'd miss the experience with your friends in the changing room*  
162                     *especially before, the build-up, the excitement...”*

163

# 164 Risk Acceptance

165 90% of players were prepared to accept the risks of playing a contact sport for the  
166 benefits they feel they gain with 7/10 stating that the risks presented in the media do  
167 not impact their decision to continue to play. Injuries were seen as part of the game,  
168 and 5/10 felt that the media portrayal of risks was potentially out of proportion.

169 9/10 players had played through injury although the level of injury was a large factor  
170 in whether players continued to play. A major factor in deciding to continue was the  
171 impact or potential impact on work. 6/10 players felt they had been lucky in their  
172 careers based on the number and severity of the injuries they had suffered.

173 **P4** *“...it’s part and parcel of it really. If you and go into it and are worrying*  
174 *about an injury my advice is don’t play.”*

175 **P5** *“ I would consider myself relatively lucky in terms of the injuries that*  
176 *I’ve sustained because they haven’t been you know, life altering or career*  
177 *ending.”*

178 **P7** *“it’s not impacted my personal perception of playing. For me I think the*  
179 *risks involved possibly been over exaggerated. So I think... you kind of know*  
180 *what you’re getting into...”*



## Discussion

To the author's knowledge this is the first study into reasons for continued participation in amateur rugby union despite high risk of injury and emerging evidence of neurodegenerative disease risk. Analysis of interviews found 4 key themes of *Community*, *Identity*, Risk Acceptance, and the *Uniqueness of Rugby* to be the major drivers commitment. An appreciation and understanding of the risks involved in continued participation is apparent, however contemplation of behaviour change (quitting the sport) in the population recruited is not evident. Rather, many strong positives associated with participation were found which outweigh these risks for players.

Media reporting of emergent evidence and exposure to former players suffering neurodegenerative disease secondary to concussion appears to have positively impacted the handling of concussion injuries and player consideration of playing through injury.

### Community

Community and social aspects of the sport were major factors for continued participation for all participants. One major finding was that social aspects of the club environment were mentioned more than experiences of physically playing the sport. 6/10 participants described the contribution to something larger than themselves as a positive aspect of participation. This act of service and contribution has been linked to a sense of meaning in life and is associated with greater happiness and wellbeing [20]. Community and the associated friendships and commitment to others has been reported by existing research into rugby participation[13,16]. However, those studies did not consider the population of comparatively young males engaging in competitive amateur sport used in the present study – arguably the largest stakeholder population of the sport.

### Identity

Identifying as a rugby player appears to be important to participants and potentially explains justification for continuing to play even after suffering injury, with 90% of players having returned to the sport after multiple injuries. Players also discussed

long term involvement in the sport with 4/10 stating they have always done it and 6/10 regarding training and matches as a large part of their weekly routine.

The sport ethic is a term used to describe the behaviours of sacrifice, risk taking, seeking distinction, and pushing limits evident in competitive sportspeople [21] and referenced as a contributing factor for playing through pain and injury in collegiate rugby players [18]. While the sport ethic was not mentioned explicitly by any participants, these values and behaviours were evident and should be recognised by medical professionals who work within rugby union as a reason for playing through injury or premature desire return to competition. 5/10 participants reported negative experiences of being sidelined with injury and perceived loss of player identity. This is consistent with the findings of Murphy and Sheehan [22] who found the psychological burden of injured players can negatively impact recovery and outcome of rehabilitation. This suggests a sense of belonging that is lost when the player is sidelined, with the physical act of playing the sport being a prerequisite to being a part of the team. This finding is of particular interest to health professionals supporting injured players who should endeavour to include the player in the team dynamic in whatever way they can, for example in water carrier or coaching roles during training and matches that they are unable to play in.

### Risk Acceptance

All players understood the musculoskeletal risk associated with playing a contact sport. They accept this risk and continue playing due to the perceived benefits of participation. Players believed they and other players “knew what they were getting into” yet paradoxically had little to no knowledge of the emergent evidence of the risk of neurodegenerative disease associated with rugby collisions beyond media headlines.

Media portrayal of rugby and the associated risks was overall seen in a negative light. Players discussed the sensationalist nature of the media, yet 9/10 players had suffered substantial physical injury with 1 recalling difficulties with light sensitivity and vomiting after concussion. There appears to be some conflict between reported experiences, publicly available epidemiology figures, and player perceptions of the risks involved. This cognitive dissonance has been seen previously in rugby literature concerning parent perceptions of risk in youth contact rugby [23]. This

suggests perhaps an element of denial from players and that sources disseminating information regarding risks needs to come from a source regarded as trustworthy.

While at the top flight, clubs have extensive medical departments, in regional rugby, only 23% of clubs were found to be compliant with RFU regulations regarding medical personnel, facility, and equipment provision and 30% of clubs were unable to confirm medical personnel had required qualifications [24]. With such poor compliance to player welfare regulations below the top level, the decision to accept the risks of injury and play is ultimately on the player. However, it remains important that players have access to trustworthy information in order to make informed decisions regarding participation. Based on the findings of this study this remains an area for improvement.

### Uniqueness of Rugby

The sanctioned aggression, physically demanding contribution to a shared goal, and social aspects that extend beyond the time on the field appear to be elements of the sport that players are unable to experience in other sports that they participate in e.g. football and golf. Factors such as the contact element (7/10) and the collective work towards something bigger than the self (6/10) would be missed should players end participation. Senecal [25] discussed the difficult transition faced by contact athletes at the end of their sporting careers and the difficulty in replacing the 'peak experiences' felt when playing. The themes of alteration in time, magnitude of joy and elation, and absorbed awareness found in that study are consistent with the aspects of rugby that participants in the current study reported. These findings, along with the reported negative experiences of being unable to participate while sidelined, suggest that it may be pertinent for players to consider life after rugby and be prepared for such a transition. This is something that sets rugby apart from other sports. Although veterans and touch or walking versions of the game are available, participation in the full contact, open age iteration has a time limit due to its physically demanding nature.

### Unexpected Results

None of the participants expressed planning to reduce participation in rugby suggesting that the sample used are in the pre-contemplative phase of behaviour change [26]. Half (5/10) of the participants had a defensive stance against the media

275 narrative of rugby being dangerous. It is possible that this is unique to amateur  
 276 players at this level who potentially do not undergo the education that professional  
 277 players may have access to via professional medical staff. Another potential reason  
 278 for this could be wilful ignorance and a desire to avoid an uncomfortable truth. This is  
 279 comparable to smokers who understand the risks and may suffer because of their  
 280 actions but continue anyway [27]. Likewise with smoking addiction and the  
 281 associated neurochemical change, rugby and the benefits derived potentially have  
 282 ‘addictive’ characteristics. While exercise addiction is well documented [28] it is  
 283 beyond the scope of this study to suggest this was evident in the players  
 284 interviewed. It is, however, well known that exercise has significant effects on the  
 285 neurochemistry of the brain [29] and the loss of belonging, stress, and low mood  
 286 associated with being sidelined through injury parallels withdrawal symptoms.

## Conclusions

Player's actions and behaviours toward participation remain unchanged despite the understanding, observation, and lived experience of musculoskeletal injury risk. Emergent evidence of neurodegenerative disease risks appeared to be not fully appreciated or understood (or potentially disregarded). The benefits that players gain from their involvement in rugby are both abundant and meaningful to them and can be organised into the major themes of *identity* and *community*, while the themes of *risk acceptance* and *uniqueness of rugby* provide insight into the justification of the choice to continue to play the sport.

Whilst these results cannot be generalised, the present study shows current players have a continued desire to be involved and that perceived benefits strongly outweigh the perceived risks of participation. It is uncertain whether further information or deeper understanding of risk would change this, though players do not appear to be contemplating behavioural change.

## Limitations

A small sample size (10) from 2 geographical locations (Gloucestershire and Yorkshire) reduces generalisability of results, therefore future research should consider larger samples from more varied populations. Use of a solo researcher prevented triangulation of qualitative analysis coding and theme development. The researcher is a former rugby player and therefore may have some inherent personal biases. Interviewees may have felt an inclination to conform due to conversing with a former rugby player, however individual interviewing and anonymised transcription allowed for open and honest responses. Total injuries were difficult to accurately report as many players could not give precise injury histories due to memory and the difficulty in knowing what would constitute an injury. Ex-players or players that have sustained injury and were not intending to return to play are likely to have provided different responses to the sample selected, however this study concerned reasons for remaining committed as opposed to consensus of players (current or former) on injury risk. This is an area that could be explored in future to compare against results of the present study.

## 318 Recommendations

319 The beliefs and actions of players is apparently contradictory with many players  
 320 stating that they “know what they are getting into” playing the game, while  
 321 simultaneously appearing to have limited knowledge of the neurodegenerative risks  
 322 involved. This suggests efforts to educate players about these risks have been  
 323 unsuccessful or that players are ignorant and avoidant of the data presented to  
 324 them.

325 Non-biased education delivered by medical professionals or via governing bodies  
 326 such as the RFU incorporating current or former players may aid in greater  
 327 acceptance by leaning into the themes of identity and community.

## 328 Competing Interests

329 The authors declare that they have no competing interests

## References

- [1]Williams S, Trewartha G, Kemp S, Stokes K. A meta-analysis of injuries in senior men's professional Rugby Union. *Sports Medicine (Auckland, N.Z.)* 2013;43(10): 1043–1055. <https://doi.org/10.1007/s40279-013-0078-1>
- [2]RFU. Community Rugby Injury Surveillance and Prevention Project Season Report 2019-20.<https://keepyourbootson.co.uk/wp-content/uploads/2022/03/CRISP-2019-20.pdf>. Published 2020a. Accessed April 26, 2023.
- [3]RFU. England Professional Rugby Injury Surveillance Project Season Report 2019-20. [https://keepyourbootson.co.uk/wp-content/uploads/2022/03/PRISP\\_2019-20.pdf](https://keepyourbootson.co.uk/wp-content/uploads/2022/03/PRISP_2019-20.pdf). Published 2020b. Accessed April 26, 2023.
- [4]Viviers PL, Viljoen, JT, Derman W. A review of a decade of rugby union injury epidemiology: 2007-2017. *Sports Health*. 2018;10(3):223–227. <https://doi.org/10.1177/1941738118757178>
- [5]Tondelli E, Boerio C, Andreu M, Antinori S. Impact, incidence and prevalence of musculoskeletal injuries in senior amateur male rugby: epidemiological study. *The Physician and Sports Medicine*. 2022;50(3):269–275. <https://doi.org/10.1080/00913847.2021.1924045>
- [6]Yeomans C, Kenny IC, Cahalan R, et al. The Incidence of Injury in Amateur Male Rugby Union: A Systematic Review and Meta-Analysis. *Sports Medicine (Auckland, N.Z.)*. 2018;48(4):837–848. <https://doi.org/10.1007/s40279-017-0838-4>
- [7]Hind K, Konerth N, Entwistle I, et al. Cumulative Sport-Related Injuries and Longer Term Impact in Retired Male Elite- and Amateur-Level Rugby Code Athletes and Non-contact Athletes: A Retrospective Study. *Sports Medicine (Auckland, N.Z.)*. 2020;50(11):2051–2061. <https://doi.org/10.1007/s40279-020-01310-y>
- [8]Davies MAM, Judge AD, Delmestri A, et al. Health amongst former rugby union players: A cross-sectional study of morbidity and health-related quality of life. *Scientific Reports*. 2017;7(1):11786. <https://doi.org/10.1038/s41598-017-12130-y>
- [9]Fuller CW. Catastrophic injury in rugby union: is the level of risk acceptable? *Sports medicine (Auckland, N.Z.)* 2008;38(12):975–986.
- [10]Bull A. Death of a Schoolboy: Why Concussion is Rugby Union's Dirty Secret. *The Guardian*, December 13 2013.<https://www.theguardian.com/sport/2013/dec/13/death-of-a-schoolboy-ben-robinson-concussion-rugby-union>. Accessed March 7, 2023.
- [11]Tator C, Starkes J, Dolansky G, Quet J, Michaud J, Vassilyadi M. Fatal Second Impact Syndrome in Rowan Stringer, A 17-Year-Old Rugby Player. *The Canadian journal of neurological sciences. Le journal canadien des sciences neurologiques*. 2019;46(3):351–354. <https://doi.org/10.1017/cjn.2019.14>



378 [12]Russell ER, Mackay DF, Lyall D, et al. Neurodegenerative disease risk among  
379 former international rugby union players. *Journal of Neurology, Neurosurgery &*  
380 *Psychiatry*. 2022;93:1262-1268. <https://doi.org/10.1136/jnnp-2022-329675>  
381  
382 [13]Fields SK, Cornstock RD. Why American Women Play Rugby. *Women in Sport*  
383 *and Physical Activity Journal*. 2008;17(2):8-18. DOI: 10.1123/wspaj.17.2.8  
384  
385 [14]Kerr JH. The multifaceted nature of participation motivation in elite Canadian  
386 women rugby union players, *International Journal of Sport and Exercise Psychology*.  
387 2021;19(1):74-89. DOI: 10.1080/1612197X.2019.1611904  
388  
389 [15]Kim G, McInch A, Kerr JH. Investigating the participation motives of women rugby  
390 union players in Canada and Wales. *Journal of motivation, emotion, and personality*.  
391 2023;12:1-9. DOI: 10.12689/jmep.2023.1201  
392  
393 [16]Dong E, Zhang L, Choe J, Pugh S. Rugby Union among middle-aged American  
394 men: an exploration. *Leisure Studies*. 2013;32(2):219-228. DOI:  
395 10.1080/02614367.2012.748089  
396  
397 [17]Kerr JH. The enjoyment of sanctioned aggression in rugby: The experience of a  
398 pioneering female Canadian team captain. *International Journal of Sport and*  
399 *Exercise Psychology*. 2019;17(6):578-590. DOI: 10.1080/1612197X.2018.1428208  
400  
401 [18]Madrigal L, Robbins J, Gill DL, Wurst K. A Pilot Study Investigating the Reasons  
402 for Playing Through Pain and Injury: Emerging Themes in Men's and Women's  
403 Collegiate Rugby. *The Sport Psychologist*. 2015;29(4):310-318. DOI:  
404 <https://doi.org/10.1123/tsp.2014-0139>  
405  
406 [19]Braun V, Clarke V. Using thematic analysis in psychology. *Qualitative Research in*  
407 *Psychology*. 2006;3(2):77-101. DOI: 10.1191/1478088706qp063oa  
408  
409 [20]Hailemariam M, Bustos TE, Felton JW, et al. Belonging to Something Greater  
410 Than Self: Flint Women Giving Back to the Community. *Progress in Community*  
411 *Health Partnerships: Research, Education, and Action*. 2022;16(2):181-191.  
412 <https://doi.org/10.1353/cpr.2022.0022>  
413  
414 [21]Hughes R, Coakley J. Positive Deviance among Athletes: The Implications of  
415 Overconformity to the Sport Ethic. *Sociology of Sport Journal*. 1991;8(4):307-325.  
416 DOI: <https://doi.org/10.1123/ssj.8.4.307>  
417  
418 [22]Murphy GP, Sheehan RB. A qualitative investigation into the individual injury  
419 burden of amateur rugby players. *Physical therapy in sport : official journal of the*  
420 *Association of Chartered Physiotherapists in Sports Medicine*. 2021;50:74-81. DOI:  
421 10.1016/j.pts.2021.04.003  
422  
423 [23]Anderson E, White A, Hardwicke J. A Qualitative Exploration of Parents'  
424 Perceptions of Risk in Youth Contact Rugby. *Behavioral sciences (Basel,*  
425 *Switzerland)*. 2022;12(12):510. <https://doi.org/10.3390/bs12120510>  
426  
427 [24]Wing K, Bailey HJ, Gronek P, Podstawski R, Clark CCT. A preliminary audit of  
428 medical and aid provision in English Rugby union clubs: compliance with Regulation



429 9. Irish Journal of Medical Science. 2019;188:1093-1101.  
 430 <https://doi.org/10.1007/s11845-018-1913-z>  
 431  
 432 [25]Senecal G. The aftermath of peak experiences: Difficult transitions for contact  
 433 sport athletes. The Humanistic Psychologist. 2021;49(2):295–313.  
 434 <https://doi.org/10.1037/hum0000164>  
 435  
 436 [26]Prochaska JO, Velicer WF. The transtheoretical model of health behaviour  
 437 change. American Journal of Health Promotion: AJHP. 1997;12(1):38-48.  
 438 <https://doi.org/10.4278/0890-1171-12.1.38>  
 439  
 440 [27]Viscusi WK. Do smokers underestimate risks?. Journal of Political Economy.  
 441 1990;98(6):1253–1269. <https://doi.org/10.1086/261733>  
 442  
 443 [28]Weinstein A, Szabo A. Exercise addiction: A narrative overview of research  
 444 issues. Dialogues in Clinical Neuroscience. 2023;25(1): 1–13.  
 445 <https://doi.org/10.1080/19585969.2023.2164841>  
 446  
 447 [29]Basso JC, Suzuki WA. The Effects of Acute Exercise on Mood, Cognition,  
 448 Neurophysiology, and Neurochemical Pathways: A Review. Brain plasticity  
 449 (Amsterdam, Netherlands). 2017;2(2):127–152. <https://doi.org/10.3233/BPL-160040>

450

## **Tables**

|                                      |                                                                                                |
|--------------------------------------|------------------------------------------------------------------------------------------------|
| <b>Age in Years (Mean±1SD)</b>       | 30±5.75                                                                                        |
| <b>Years Played (Mean±1SD)</b>       | 20±6.93                                                                                        |
| <b>Number of Injuries (Mean±1SD)</b> | 4.7±3.6                                                                                        |
| <b>Nature of Injuries</b>            | Fracture, Dislocation, Ligament Tear, Muscle Tear, Cartilage<br>Tear, Concussion, Nerve Damage |
| <b>Most Common Injury Site</b>       | Knee 6/10, Hand 6/10                                                                           |

451

**Table 1. Descriptive Statistics of Sample**

| Injured Area | # of Participants<br>Reporting Injury | Incidence                                        |
|--------------|---------------------------------------|--------------------------------------------------|
| Knee         | 6                                     | 13 (MCL x5, ACL x3, Meniscus x4, Dislocation x1) |
| Hand/Fingers | 6                                     | 8 (Fracture x5, Dislocation x3)                  |
| Head/Face    | 5                                     | 13 (Concussion x10, Nasal Fracture x3)           |
| Shoulder     | 4                                     | 5 (Fracture x3, Ligament x2)                     |
| Ankle        | 4                                     | 3 (Ligament x2, Fracture x1)                     |
| Arm          | 2                                     | 5 (Fracture x5)                                  |
| Leg          | 1                                     | 1 (Muscle Tear x1)                               |
| Nerve Damage | 1                                     | 1 (Nerve Damage x1)                              |

452 Table 2. Sample Injuries

| Major Theme         | Initial Themes                | Code                                                                | Participant Codes |    |    |    |    |    |    |    |    |     | # of N |
|---------------------|-------------------------------|---------------------------------------------------------------------|-------------------|----|----|----|----|----|----|----|----|-----|--------|
|                     |                               |                                                                     | P1                | P2 | P3 | P4 | P5 | P6 | P7 | P8 | P9 | F10 |        |
| Community           | Community                     | Social Aspects / Community Team                                     | x                 | x  | x  | x  | x  | x  | x  | x  | x  | x   | 10     |
|                     |                               | Contributing to Something Larger than Commitment and Accountability | x                 | x  | x  |    |    | x  |    | x  |    | x   | 6      |
|                     | Commitment and Accountability | Caring the Club                                                     | x                 | x  |    | x  |    | x  |    |    |    | x   | 5      |
|                     |                               | Not Letting People Down                                             |                   | x  |    |    |    |    |    |    | x  | x   | 1      |
|                     |                               | Winning                                                             | x                 | x  | x  |    | x  | x  |    |    | x  | x   | 7      |
| Uniqueness of Rugby | Identity As a Rugby Player    | Negative Experiences on Sidelines                                   |                   | x  | x  | x  | x  |    |    |    | x  |     | 5      |
|                     |                               | Not one                                                             | x                 | x  | x  |    |    | x  | x  | x  |    |     | 6      |
|                     |                               | Stereotypes of Rugby Players                                        |                   | x  | x  |    | x  |    |    |    |    |     | 3      |
|                     |                               | Have Always Done It                                                 | x                 |    |    |    | x  | x  |    | x  |    |     | 4      |
|                     |                               | Identity                                                            |                   |    |    |    | x  |    |    | x  | x  |     | 3      |
|                     | Physical                      | Physicality                                                         | x                 |    | x  | x  | x  | x  |    | x  |    | x   | 7      |
|                     |                               | Fitness                                                             |                   | x  | x  |    | x  | x  |    | x  |    | x   | 0      |
|                     |                               | Escapism                                                            | x                 | x  | x  |    | x  |    |    |    |    | x   | 5      |
|                     |                               | Aggression                                                          |                   |    |    | x  | x  |    |    |    |    |     | 2      |
|                     | Other                         | Rugby is Different                                                  |                   |    |    | x  | x  | x  |    |    |    |     | 3      |
|                     |                               | Sense of Achievement                                                | x                 |    |    |    |    | x  |    | x  | x  |     | 4      |
|                     |                               | Love of The Game                                                    |                   | x  |    |    |    | x  |    |    |    |     | 3      |
|                     |                               | Values                                                              |                   |    |    | x  |    |    |    | x  |    |     | 2      |
| Risk Acceptance     | Acceptance of Risk            | Acceptance of Risk                                                  | x                 | x  | x  | x  | x  | x  |    | x  | x  | x   | 9      |
|                     |                               | Fortune/Luck                                                        | x                 |    | x  |    | x  |    | x  | x  |    | x   | 6      |
|                     |                               | Part of The Game                                                    | x                 |    | x  | x  |    |    |    |    |    |     | 3      |
|                     |                               | Amateur vs Professional                                             |                   |    | x  |    |    | x  | x  |    |    |     | 3      |
|                     |                               | Seeing Others Get Hurt                                              | x                 |    |    |    | x  |    | x  |    |    | x   | 4      |
|                     | Ignorance                     | Cracking On                                                         | x                 |    |    |    | x  |    |    |    | x  | x   | 4      |
|                     |                               | Don't Think About Getting Injured                                   | x                 |    |    |    |    | x  |    |    |    | x   | 3      |
|                     |                               | Ignorance/Arrogance                                                 |                   |    |    | x  |    |    |    |    |    | x   | 2      |
|                     |                               | Don't Consider Future Implications                                  |                   |    |    |    |    |    |    |    |    | x   | 1      |
|                     | Levels of Injury              | Levels of Injury                                                    | x                 | x  | x  |    | x  | x  | x  | x  | x  | x   | 9      |
|                     |                               | Playing Injured                                                     | x                 | x  | x  | x  | x  |    | x  | x  | x  | x   | 9      |
|                     |                               | Impact on Work                                                      |                   | x  | x  | x  | x  |    |    | x  | x  |     | 0      |
|                     |                               | Lingering Symptoms                                                  |                   | x  | x  | x  |    |    |    | x  | x  |     | 4      |
|                     |                               | Is It Worth It?                                                     | x                 | x  |    |    |    |    |    |    |    | x   | 3      |
|                     |                               | Return From Injury                                                  | x                 |    | x  |    |    |    |    |    | x  |     | 3      |
|                     |                               | When to Retire                                                      | x                 |    | x  |    | x  |    |    |    |    |     | 3      |
|                     | Media Influence               | Permanent Damage                                                    |                   |    |    |    |    | x  |    |    |    | x   | 1      |
|                     |                               | Does Not Affect Decision to Play                                    | x                 | x  |    |    | x  | x  | x  |    | x  | x   | 7      |
|                     |                               | Media Portrayal Out of Proportion                                   | x                 | x  |    | x  | x  |    | x  |    |    |     | 5      |
|                     |                               | Makes You Think About Risks                                         |                   |    |    |    | x  |    |    | x  | x  | x   | 4      |

*Table 3. Thematic Analysis Breakdown*

455

## **Appendices**

456

### **Appendix A. Interview Schedule**

#### **Interview Schedule**

Schedule items:

1. What positives do you feel you gain from playing rugby?
2. What are your experiences with injury and does that factor into continued participation?
3. Have you continued to participate with symptoms or lasting effects from previous injuries?
4. What would you miss if you stopped playing?
5. What keeps you committed to the sport?
6. How do you feel about the recent media portrayal of risks involved and has this impacted your perception on playing?

457

## **Acknowledgements**

### **Conflict of Interest**

The authors declare that they have no competing interests

### **Ethical Approval**

Ethical approval was granted by the Chair of the Biomedical, Natural, Physical and Health Sciences Research Ethics Panel at the University of Bradford on 12th October 2023 with amendments approved 13th November 2023.

### **Funding**

This research did not receive any specific grant from funding agencies in the public, commercial, or not-for-profit sectors
